# Supplementary material for: Modulation of transport properties via S/Br substitution: solvothermal synthesis, crystal structure, and transport properties of Bi13S17Br3
Source: Royal Society of Chemistry journal article supplement (doi:10.1039/d2dt02295h), 2022-01-01
Supplement: d2dt02295h1.pdf [file d2dt02295h1.pdf]

## Supplemental Information

### **Modulation of Transport Properties *via* S/Br Substitution: Solvothermal Synthesis, Crystal Structure, and Transport Properties of Bi<sub>13</sub>S<sub>17</sub>Br<sub>3</sub>**

Dinesh K. Amarasinghe,<sup>a</sup> Philip Yox,<sup>a,b</sup> Gayatri Viswanathan,<sup>a,b</sup> Adedoyin N. Adeyemi,<sup>a</sup> and Kirill Kovnir<sup>a,b,\*</sup>

<sup>a</sup> *Department of Chemistry, Iowa State University, Ames, Iowa 50011, USA*

<sup>b</sup> *Ames National Laboratory, U.S. Department of Energy, Ames, Iowa 50011, USA*

\*Corresponding Author. Email: [kovnir@iastate.edu](mailto:kovnir@iastate.edu)

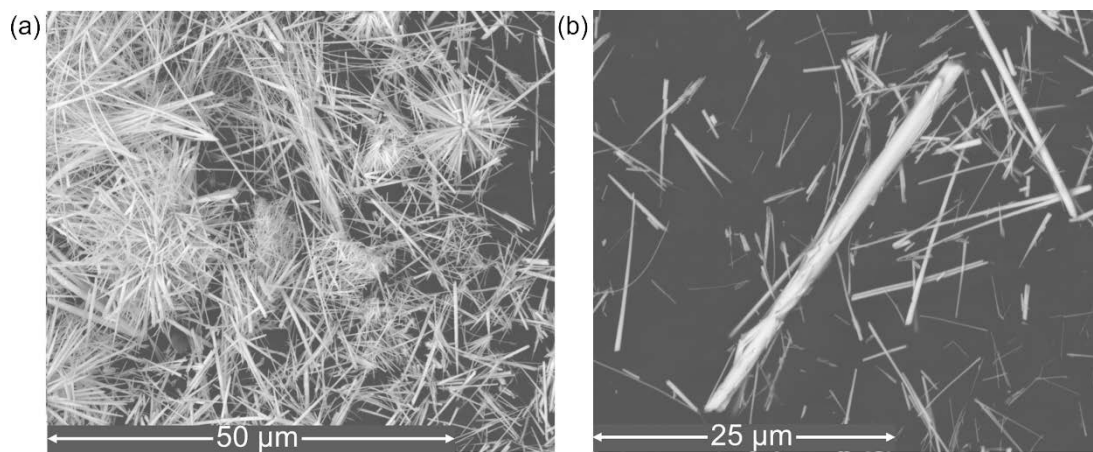

Fig. S1. Backscattered electron images of (a)  $\text{Bi}_{13}\text{S}_{17}\text{Br}_3$  and (b)  $\text{Bi}_{13}\text{S}_{18}\text{I}_2$  samples.

Table S1. Comparison of the elemental compositions from EDS analyses with the corresponding theoretical values for  $\text{Bi}_{12.9}\text{S}_{17.2}\text{Br}_{2.9}$  and  $\text{Bi}_{13}\text{S}_{18}\text{I}_2$ .

| Element | Atomic percentage (%)                            |              |                                         |              |
|---------|--------------------------------------------------|--------------|-----------------------------------------|--------------|
|         | $\text{Bi}_{12.9}\text{S}_{17.2}\text{Br}_{2.9}$ |              | $\text{Bi}_{13}\text{S}_{18}\text{I}_2$ |              |
|         | Theoretical                                      | Experimental | Theoretical                             | Experimental |
| Bi      | 39.1                                             | 39.2(4)      | 39.4                                    | 39.5(2)      |
| S       | 52.1                                             | 52.4(5)      | 54.5                                    | 53.7(2)      |
| Br      | 8.8                                              | 8.4(4)       |                                         |              |
| I       |                                                  |              | 6.1                                     | 6.8(2)       |

Table S2. Fractional atomic coordinates and isotropic displacement parameters of  $\text{Bi}_{13}\text{S}_{17}\text{Br}_3$  obtained from SCXRD refinement.

|             | $x/a$       | $y/b$       | $z/c$    | $U_{\text{iso}} (\text{\AA}^2)$ | Occupancy |
|-------------|-------------|-------------|----------|---------------------------------|-----------|
| <b>Bi1</b>  | 0.60958(7)  | 0.48268(6)  | 0.885(3) | 0.0078(3)                       | 1         |
| <b>Bi2a</b> | 0.70295(11) | 0.75519(19) | 0.378(3) | 0.0054(4)                       | 0.877(8)  |
| <b>Bi2b</b> | 0.7121(7)   | 0.7878(13)  | 0.359(7) | 0.0054(4)                       | 0.123     |
| <b>Bi3</b>  | 0           | 0           | 0.012(6) | 0.011(2)                        | 0.21(2)   |
| <b>Bi4</b>  | 0           | 0           | 0.726(5) | 0.011(2)                        | 0.24(2)   |
| <b>Br1</b>  | 2/3         | 1/3         | 0.372(6) | 0.005(1)                        | 1         |
| <b>S1</b>   | 0.8331(4)   | 0.8142(4)   | 0.882(6) | 0.003(1)                        | 1         |
| <b>S2</b>   | 0.7383(3)   | 0.6006(3)   | 0.384(6) | 0.010(1)                        | 0.877(8)  |
| <b>Br2</b>  | 0.7383(3)   | 0.6006(3)   | 0.384(6) | 0.010(1)                        | 0.123     |
| <b>S3</b>   | 0.5477(4)   | 0.6105(4)   | 0.872(7) | 0.001(2)                        | 0.98(1)   |
| <b>Br3</b>  | 0.5477(4)   | 0.6105(4)   | 0.872(7) | 0.001(2)                        | 0.02      |

Table S3. Selected interatomic distances for Bi1, Bi2a, Bi2b, Bi3, and Bi4 metal sites in the structure of Bi<sub>13</sub>S<sub>17</sub>Br<sub>3</sub> obtained from SCXRD refinement.

|             |     | Distance (Å) |
|-------------|-----|--------------|
| Bi1–S2/Br2  | × 1 | 2.765(17)    |
| Bi1–S2/Br2  | × 1 | 2.774(17)    |
| Bi1–S3/Br3  | × 1 | 2.593(5)     |
| Bi1–S3/Br3  | × 1 | 2.953(18)    |
| Bi1–S3/Br3  | × 1 | 2.879(18)    |
| Bi2a–S1     | × 1 | 2.667(17)    |
| Bi2a–S1     | × 1 | 3.027(5)     |
| Bi2a–S1     | × 1 | 2.646(18)    |
| Bi2a–S2/Br2 | × 1 | 2.708(5)     |
| Bi2a–S3/Br3 | × 1 | 3.085(17)    |
| Bi2a–S3/Br3 | × 1 | 3.050(17)    |
| Bi2b–S1     | × 1 | 2.56(3)      |
| Bi2b–S1     | × 1 | 2.593(18)    |
| Bi2b–S1     | × 1 | 2.70(3)      |
| Bi2b–S2/Br2 | × 1 | 3.121(18)    |
| Bi2b–S2/Br2 | × 1 | 3.15(2)      |
| Bi2b–S2/Br2 | × 1 | 3.27(2)      |
| Bi3–S1      | × 3 | 2.789(10)    |
| Bi3–S1      | × 3 | 3.12(2)      |
| Bi4–S1      | × 3 | 2.810(10)    |

Table S4. Selected angles for Bi1, Bi2a, Bi2b, Bi3, and Bi4 metal sites in the structure of Bi<sub>13</sub>S<sub>17</sub>Br<sub>3</sub> obtained from SCXRD refinement.

|                    |     | Bond Angle (°) |
|--------------------|-----|----------------|
| S3/Br3–Bi1–S2/Br2  | × 1 | 84.3(4)        |
| S3/Br3–Bi1–S2/Br2  | × 1 | 86.0(4)        |
| S2/Br2–Bi1–S2/Br2  | × 1 | 92.58(14)      |
| S3/Br3–Bi1–S3/Br3  | × 1 | 80.2(4)        |
| S3/Br3–Bi1–S3/Br3  | × 1 | 81.6(3)        |
| S3/Br3–Bi1–S3/Br3  | × 1 | 86.70(14)      |
| S2/Br2–Bi1–S3/Br3  | × 1 | 87.9(5)        |
| S2/Br2–Bi1–S3/Br3  | × 1 | 89.5(5)        |
| S2/Br2–Bi1–S3/Br3  | × 1 | 166.09(17)     |
| S2/Br2–Bi1–S3/Br3  | × 1 | 165.6(2)       |
| S1–Bi2a–S1         | × 1 | 97.80(17)      |
| S1–Bi2a–S1         | × 1 | 73.1(3)        |
| S1–Bi2a–S1         | × 1 | 72.9(3)        |
| S1–Bi2a–S2/Br2     | × 1 | 81.7(4)        |
| S1–Bi2a–S2/Br2     | × 1 | 81.1(4)        |
| S1–Bi2a–S2/Br2     | × 1 | 140.41(14)     |
| S1–Bi2a–S3/Br3     | × 1 | 86.8(5)        |
| S1–Bi2a–S3/Br3     | × 1 | 86.5(5)        |
| S1–Bi2a–S3/Br3     | × 1 | 157.5(3)       |
| S1–Bi2a–S3/Br3     | × 1 | 157.8(3)       |
| S1–Bi2a–S3/Br3     | × 1 | 129.0(5)       |
| S1–Bi2a–S3/Br3     | × 1 | 128.9(5)       |
| S2/Br2–Bi2a–S3/Br3 | × 1 | 77.3(3)        |
| S2/Br2–Bi2a–S3/Br3 | × 1 | 78.0(4)        |
| S3/Br3–Bi2a–S3/Br3 | × 1 | 81.47(13)      |
| S1–Bi2b–S1         | × 1 | 79.7(6)        |
| S1–Bi2b–S1         | × 1 | 82.4(6)        |
| S1–Bi2b–S2/Br2     | × 1 | 74.3(6)        |
| S1–Bi2b–S2/Br2     | × 1 | 73.4(5)        |
| S1–Bi2b–S2/Br2     | × 1 | 141.5(4)       |
| S1–Bi2b–S2/Br2     | × 1 | 75.4(6)        |
| S1–Bi2b–S2/Br2     | × 1 | 151.5(8)       |
| S1–Bi2b–S2/Br2     | × 1 | 74.3(6)        |
| S1–Bi2b–S2/Br2     | × 1 | 89.0(9)        |

|           |     | Bond Angle (°) |
|-----------|-----|----------------|
| S1–Bi3–S1 | × 3 | 99.3(9)        |
| S1–Bi3–S1 | × 3 | 162.40(15)     |
| S1–Bi3–S1 | × 6 | 69.9(2)        |
| S1–Bi3–S1 | × 3 | 116.6(5)       |
| S1–Bi4–S1 | × 3 | 101.4(8)       |
| S1–Bi4–S1 | × 2 | 115.2(5)       |
| S1–Bi4–S1 | × 1 | 115.2(6)       |
| S1–Bi4–S1 | × 3 | 166.10(14)     |
| S1–Bi4–S1 | × 6 | 70.37(15)      |

Table S5. Structural parameters of  $\text{Bi}_{13}\text{S}_{17}\text{Br}_3$  extracted from Rietveld and PDF analyses.

|                                | Rietveld        | PDF                                              |                                             |
|--------------------------------|-----------------|--------------------------------------------------|---------------------------------------------|
| $a$ (Å)                        | 15.5069(3)      | 15.585(4)                                        |                                             |
| $c$ (Å)                        | 4.01119(2)      | 4.0114(17)                                       |                                             |
| $V$ (Å <sup>3</sup> )          | 835.318(17)     | 843.8(8)                                         |                                             |
| $x, y, z,$<br>$U_{\text{iso}}$ | Bi1             | 0.61050(7), 0.48340(7), 0.9464(19)<br>0.0153(3)  | 0.6106(3), 0.4835(3), 0.941(5)<br>0.020(5)  |
|                                | Bi2a            | 0.70245(10), 0.75474(8), 0.4317(19)<br>0.0134(3) | <i>Fixed at Rietveld values</i><br>0.025(8) |
|                                | Bi2b            | 0.7092(6), 0.7915(5), 0.444(12)<br>0.0134(3)     | <i>Fixed at Rietveld values</i><br>0.025(8) |
|                                | Bi3             | 0, 0, 0.104(6)<br>0.0184(18)                     | <i>Fixed at Rietveld values</i><br>0.007(1) |
|                                | Bi4             | 0, 0, 0.807(5)<br>0.0184(18)                     | <i>Fixed at Rietveld values</i><br>0.007(1) |
|                                | Br1             | 2/3, 1/3, 0.428(5)<br>0.0238(12)                 | 2/3, 1/3, 0.398(7)<br>0.032(4)              |
|                                | S1              | 0.8341(4), 0.8137(5), 0.982(3)<br>0.014(2)       | 0.844(15), 0.826(18), 0.00(5)<br>0.026(5)   |
|                                | S2/Br2          | 0.7359(3), 0.6001(4), 0.437(9)<br>0.0204(13)     | 0.735(14), 0.597(2), 0.492(10)<br>0.06(1)   |
|                                | S3/Br3          | 0.5470(4), 0.6073(4), 0.924(5)<br>0.0068(17)     | 0.552(18), 0.613(19), 0.869(5)<br>0.032(4)  |
|                                | $R_{\text{wp}}$ | 5.7%                                             |                                             |
| $R_{\text{w}}$                 |                 | 8.5%                                             |                                             |

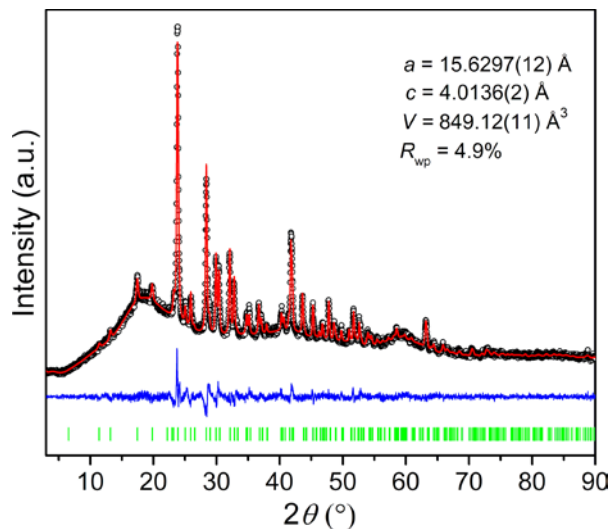

Fig. S2. Rietveld fit of lab PXRD pattern of  $\text{Bi}_{13}\text{S}_{18}\text{I}_2$ . Black circles, red trace, and blue trace correspond to experimental PXRD data, calculated pattern, and difference curve, respectively. Green vertical bars in the Rietveld plot indicate the calculated positions of the diffraction maxima. Extracted unit cell parameters are provided with the  $R_{\text{wp}}$  residual.

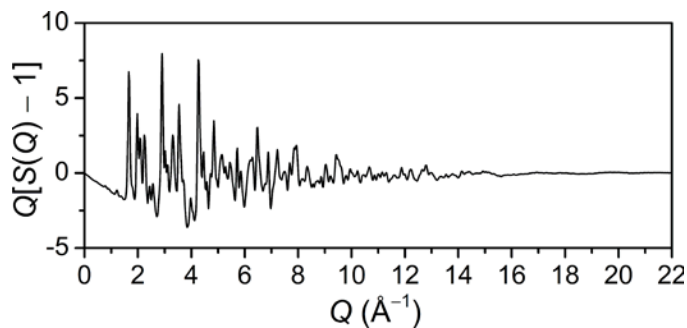

Fig. S3. Structure function of  $\text{Bi}_{13}\text{S}_{17}\text{Br}_3$ .



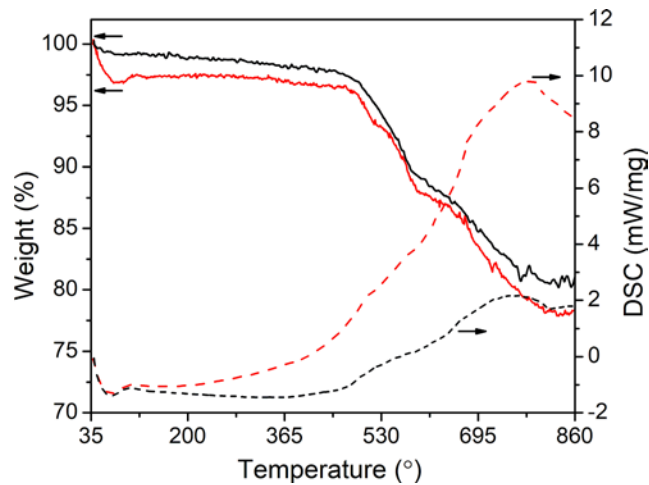

Fig. S4. TGA/DSC analysis of Bi<sub>13</sub>S<sub>17</sub>Br<sub>3</sub> (red trace) and Bi<sub>13</sub>S<sub>18</sub>I<sub>2</sub> (black trace). Solid (dashed) lines correspond to TGA (DSC) data. No thermal decomposition of the two compounds was observed up to ~450 °C.

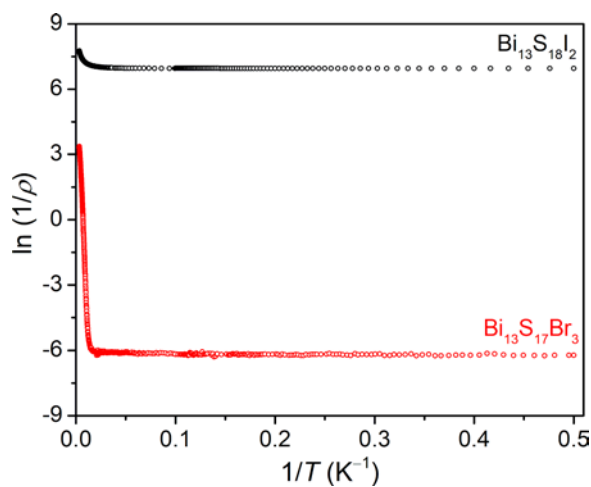

Fig. S5. The plot of  $\ln(1/\rho)$  vs  $(1/T)$  for Bi<sub>13</sub>S<sub>17</sub>Br<sub>3</sub> (red trace) and Bi<sub>13</sub>S<sub>18</sub>I<sub>2</sub> (black trace).
